# Supplementary material for: Fungal genome and mating system transitions facilitated by chromosomal translocations involving intercentromeric recombination
Source: PubMed Central journal article supplement (PMC5568439; doi:10.1371/journal.pbio.2002527), 2017-08-11
Supplement: pbio.2002527.s007.pdf [file pbio.2002527.s007.pdf]

Table S1. Insertion/deletion and chromosomal rearrangements identified between the genomes of CBS6039 and CBS6273.

| Type of event                    | CBS6039<br>(chromosome) | CBS6273<br>(chromosome) | Size of event<br>(CBS6039) | Size of event<br>(CBS6273) | Midpoint of event<br>(CBS6039) | Midpoint of event<br>(CBS6273) |
|----------------------------------|-------------------------|-------------------------|----------------------------|----------------------------|--------------------------------|--------------------------------|
| duplication in CBS6273           | 7                       | 7                       | -4127                      | 5843                       | 101308                         | 38857                          |
| insertion/duplication in CBS6273 | 2                       | 1                       | -1835                      | 100                        | 246303                         | 232073                         |
| duplication in both strains      | 2                       | 1                       | -738                       | -738                       | 20279                          | 20673                          |
| duplication in both strains      | 2                       | 1                       | -738                       | -738                       | 22633                          | 22290                          |
| insertion/duplication in CBS6273 | 1                       | 2                       | -651                       | 670                        | 2112006                        | 113742                         |
| insertion/duplication in CBS6273 | 7                       | 7                       | -536                       | 929                        | 730799                         | 665745                         |
| insertion/duplication in CBS6273 | 9                       | 9                       | -449                       | 271                        | 248661                         | 249865                         |
| inversion in CBS6273             | 9                       | 9                       | -449                       | 2421                       | 275402                         | 277190                         |
| duplication in both strains      | 1                       | 2                       | -387                       | -1455                      | 2105068                        | 120390                         |
| insertion/duplication in CBS6273 | 11                      | 11                      | -334                       | 1432                       | 796173                         | 815415                         |
| insertion/duplication in CBS6273 | 4                       | 4                       | -333                       | 287                        | 1408547                        | 1399651                        |
| insertion/duplication in CBS6273 | 10                      | 10                      | -273                       | 1764                       | 100758                         | 108187                         |
| insertion/duplication in CBS6273 | 14                      | 14                      | -269                       | 4822                       | 767573                         | 770942                         |
| insertion/duplication in CBS6273 | 13                      | 13                      | -248                       | 0                          | 813203                         | 814907                         |
| insertion/duplication in CBS6273 | 14                      | 14                      | -198                       | 88                         | 720579                         | 721099                         |
| insertion/duplication in CBS6273 | 10                      | 10                      | -165                       | 39                         | 60666                          | 66392                          |
| duplication in CBS6273           | 6                       | 6                       | -158                       | 0                          | 1212411                        | 329437                         |
| insertion/duplication in CBS6273 | 2                       | 1                       | -107                       | 3017                       | 1876313                        | 1885731                        |
| insertion/duplication in CBS6273 | 14                      | 14                      | -98                        | 116                        | 42585                          | 49916                          |
| insertion/duplication in CBS6273 | 13                      | 13                      | -94                        | 256                        | 86707                          | 89156                          |
| insertion/duplication in CBS6273 | 10                      | 10                      | -75                        | 151                        | 1076988                        | 1089725                        |
| insertion/duplication in CBS6273 | 1                       | 2                       | -69                        | 4                          | 951404                         | 1272971                        |
| insertion/duplication in CBS6273 | 9                       | 9                       | -61                        | 100                        | 305899                         | 307092                         |
| duplication in both strains      | 6                       | 6                       | -49                        | -49                        | 122023                         | 1406730                        |
| duplication in both strains      | 6                       | 6                       | -49                        | -49                        | 122214                         | 1406539                        |
| insertion/duplication in CBS6273 | 8                       | 8                       | -45                        | 18                         | 157072                         | 160854                         |
| insertion/duplication in CBS6273 | 13                      | 13                      | -44                        | 1                          | 947630                         | 949545                         |
| insertion/duplication in CBS6273 | 14                      | 14                      | -43                        | 135                        | 593511                         | 593803                         |
| insertion/duplication in CBS6273 | 3                       | 3                       | -40                        | 108                        | 99169                          | 1607641                        |
| insertion/duplication in CBS6273 | 5                       | 5                       | -39                        | 252                        | 30160                          | 31158                          |
| insertion/duplication in CBS6273 | 11                      | 11                      | -35                        | 147                        | 533340                         | 533866                         |
| insertion/duplication in CBS6273 | 13                      | 13                      | -28                        | 100                        | 437040                         | 437300                         |
| insertion/duplication in CBS6273 | 10                      | 10                      | -22                        | 537                        | 112219                         | 120971                         |

| Type of event                    | CBS6039<br>(chromosome) | CBS6273<br>(chromosome) | Size of event<br>(CBS6039) | Size of event<br>(CBS6273) | Midpoint of event<br>(CBS6039) | Midpoint of event<br>(CBS6273) |
|----------------------------------|-------------------------|-------------------------|----------------------------|----------------------------|--------------------------------|--------------------------------|
| insertion/duplication in CBS6273 | 6                       | 6                       | -22                        | 346                        | 194521                         | 1334403                        |
| insertion/duplication in CBS6273 | 8                       | 8                       | -14                        | 37                         | 324290                         | 327814                         |
| inversion in CBS6273             | 14                      | 14                      | -13                        | NA                         | 194906                         | 793477                         |
| insertion/duplication in CBS6273 | 12                      | 12                      | -13                        | 195                        | 812917                         | 254729                         |
| insertion/duplication in CBS6039 | 10                      | 10                      | -12                        | 57                         | 226213                         | 232611                         |
| insertion/duplication in CBS6273 | 4                       | 4                       | -12                        | 44                         | 1403508                        | 1394261                        |
| duplication in both strains      | 2                       | 1                       | -12                        | -3183                      | 2217497                        | 2221178                        |
| insertion/duplication in CBS6273 | 13                      | 13                      | -8                         | 264                        | 974605                         | 977194                         |
| insertion/duplication in CBS6273 | 6                       | 6                       | -7                         | 194                        | 15402                          | 1513821                        |
| insertion/duplication in CBS6273 | 12                      | 12                      | -7                         | 305                        | 50665                          | 1043019                        |
| insertion/duplication in CBS6273 | 12                      | 12                      | -7                         | 5231                       | 899318                         | 165581                         |
| insertion/duplication in CBS6273 | 5                       | 5                       | -7                         | 37                         | 1337604                        | 1324437                        |
| insertion/duplication in CBS6273 | 13                      | 13                      | -6                         | 530                        | 86650                          | 88656                          |
| insertion/duplication in CBS6273 | 5                       | 5                       | -6                         | 309                        | 151896                         | 153489                         |
| insertion/duplication in CBS6273 | 4                       | 4                       | -6                         | 309                        | 966651                         | 968297                         |
| insertion/duplication in CBS6273 | 2                       | 1                       | -6                         | 1020                       | 1329821                        | 1337210                        |
| insertion/duplication in CBS6273 | 4                       | 4                       | -5                         | 312                        | 11124                          | 11188                          |
| insertion/duplication in CBS6273 | 7                       | scaffold00016           | -5                         | 5101                       | 20306                          | 23174                          |
| insertion/duplication in CBS6273 | 2                       | 1                       | -5                         | 310                        | 44773                          | 44841                          |
| insertion/duplication in CBS6273 | 4                       | 4                       | -5                         | 301                        | 54781                          | 56038                          |
| insertion/duplication in CBS6273 | 10                      | 10                      | -5                         | 310                        | 90301                          | 96288                          |
| insertion/duplication in CBS6273 | 10                      | 10                      | -5                         | 383                        | 96082                          | 102375                         |
| insertion/duplication in CBS6273 | 14                      | 14                      | -5                         | 299                        | 176368                         | 184286                         |
| insertion/duplication in CBS6273 | 10                      | 10                      | -5                         | 194                        | 1092214                        | 1105200                        |
| insertion/duplication in CBS6273 | 10                      | 10                      | -5                         | 267                        | 1136907                        | 1146660                        |
| insertion/duplication in CBS6273 | 2                       | 1                       | -5                         | 2434                       | 1212243                        | 1217874                        |
| insertion/duplication in CBS6273 | 3                       | 3                       | -5                         | 531                        | 1351691                        | 355659                         |
| insertion/duplication in CBS6273 | 4                       | 4                       | -5                         | 300                        | 1369141                        | 1358861                        |
| insertion/duplication in CBS6273 | 4                       | 4                       | -5                         | 429                        | 1425755                        | 1417384                        |
| insertion/duplication in CBS6273 | 5                       | 5                       | -5                         | 193                        | 1491172                        | 1475606                        |
| insertion/duplication in CBS6273 | 1                       | 2                       | -5                         | 1062                       | 2070602                        | 155529                         |
| insertion/duplication in CBS6273 | 1                       | 2                       | -3                         | 859                        | 525121                         | 1699593                        |
| insertion/duplication in CBS6273 | 10                      | 10                      | -3                         | 198                        | 1093596                        | 1106771                        |
| insertion/duplication in CBS6273 | 7                       | 7                       | -2                         | 64                         | 779154                         | 714849                         |

| Type of event                    | CBS6039<br>(chromosome) | CBS6273<br>(chromosome) | Size of event<br>(CBS6039) | Size of event<br>(CBS6273) | Midpoint of event<br>(CBS6039) | Midpoint of event<br>(CBS6273) |
|----------------------------------|-------------------------|-------------------------|----------------------------|----------------------------|--------------------------------|--------------------------------|
| insertion/duplication in CBS6273 | 12                      | 12                      | -2                         | 190                        | 901874                         | 160322                         |
| duplication in CBS6039           | 5                       | 5                       | -2                         | -2700                      | 1441641                        | 1427278                        |
| insertion/duplication in CBS6039 | 2                       | 1                       | -2                         | -1890                      | 2148629                        | 2158743                        |
| insertion/duplication in CBS6273 | 10                      | 10                      | -1                         | 5936                       | 43804                          | 46462                          |
| insertion/duplication in CBS6273 | 7                       | 7                       | -1                         | 1252                       | 117544                         | 57780                          |
| insertion/duplication in CBS6273 | 12                      | 12                      | -1                         | 411                        | 918101                         | 143787                         |
| insertion/duplication in CBS6273 | 6                       | 6                       | -1                         | 167                        | 1364806                        | 177067                         |
| deletion in CBS6039              | 3                       | 3                       | 0                          | 50                         | 2301                           | 1704827                        |
| duplication in CBS6039           | 4                       | 4                       | 0                          | -67                        | 27055                          | 27240                          |
| deletion in CBS6039              | 6                       | 6                       | 0                          | 237                        | 39037                          | 1489959                        |
| deletion in CBS6039              | 5                       | 5                       | 0                          | 2740                       | 50704                          | 52874                          |
| deletion in CBS6039              | 8                       | 8                       | 0                          | 2539                       | 54762                          | 56997                          |
| deletion in CBS6039              | 14                      | 14                      | 0                          | 317                        | 60650                          | 68235                          |
| deletion in CBS6039              | 5                       | 5                       | 0                          | 94                         | 116542                         | 119497                         |
| deletion in CBS6039              | 1                       | 2                       | 0                          | 95                         | 119004                         | 2105730                        |
| deletion in CBS6039              | 10                      | 10                      | 0                          | 350                        | 161877                         | 168082                         |
| deletion in CBS6039              | 12                      | 12                      | 0                          | 547                        | 168484                         | 924795                         |
| deletion in CBS6039              | 7                       | 7                       | 0                          | 100                        | 230296                         | 164493                         |
| deletion in CBS6039              | 10                      | 10                      | 0                          | 2126                       | 307356                         | 314871                         |
| deletion in CBS6039              | 11                      | 11                      | 0                          | 13                         | 334352                         | 334816                         |
| deletion in CBS6039              | 1                       | 2                       | 0                          | 105                        | 335651                         | 1889585                        |
| deletion in CBS6039              | 6                       | 6                       | 0                          | 36                         | 433780                         | 1095345                        |
| insertion in CBS6039             | 11                      | 11                      | 0                          | -348                       | 581170                         | 594849                         |
| duplication in CBS6039           | 8                       | 8                       | 0                          | -319                       | 675505                         | 678945                         |
| deletion in CBS6039              | 8                       | 8                       | 0                          | 186                        | 680764                         | 684138                         |
| deletion in CBS6039              | 14                      | 14                      | 0                          | 85                         | 786642                         | 786626                         |
| deletion in CBS6039              | 10                      | 10                      | 0                          | 143                        | 871171                         | 884416                         |
| deletion in CBS6039              | 9                       | 9                       | 0                          | 416                        | 892573                         | 897268                         |
| deletion in CBS6039              | 13                      | 13                      | 0                          | 811                        | 955114                         | 957441                         |
| deletion in CBS6039              | 4                       | 4                       | 0                          | 125                        | 1001557                        | 1003415                        |
| deletion in CBS6039              | 10                      | 10                      | 0                          | 12                         | 1014486                        | 1027148                        |
| duplication in CBS6039           | 8                       | 8                       | 0                          | -119                       | 1039646                        | 1043670                        |
| deletion in CBS6039              | 3                       | 3                       | 0                          | 52                         | 1062023                        | 645655                         |
| deletion in CBS6039              | 6                       | 6                       | 0                          | 145                        | 1239025                        | 302482                         |

| Type of event                    | CBS6039<br>(chromosome) | CBS6273<br>(chromosome) | Size of event<br>(CBS6039) | Size of event<br>(CBS6273) | Midpoint of event<br>(CBS6039) | Midpoint of event<br>(CBS6273) |
|----------------------------------|-------------------------|-------------------------|----------------------------|----------------------------|--------------------------------|--------------------------------|
| deletion in CBS6039              | 4                       | 4                       | 0                          | 4802                       | 1481222                        | 1473769                        |
| duplication in CBS6039           | 3                       | 3                       | 0                          | -680                       | 1567121                        | 140397                         |
| inversion in CBS6273             | 5                       | 5                       | 0                          | 2                          | 1575044                        | 1559622                        |
| deletion in CBS6039              | 3                       | 3                       | 0                          | 35                         | 1588509                        | 119331                         |
| inversion in CBS6273             | 4                       | 4                       | 0                          | 167                        | 1608362                        | 1599962                        |
| deletion in CBS6039              | 1                       | 2                       | 0                          | 776                        | 1854593                        | 370952                         |
| deletion in CBS6039              | 9                       | 9                       | 1                          | 209                        | 121912                         | 121986                         |
| deletion in CBS6039              | 12                      | 12                      | 1                          | 2369                       | 508691                         | 561252                         |
| deletion in CBS6039              | 4                       | 4                       | 1                          | 631                        | 1369479                        | 1359664                        |
| insertion/duplication in CBS6039 | 9                       | 9                       | 2                          | -37                        | 1164667                        | 1160572                        |
| deletion in CBS6039              | 1                       | 2                       | 2                          | 132                        | 1196129                        | 1028382                        |
| deletion in CBS6039              | 3                       | 3                       | 3                          | 108                        | 59504                          | 1647433                        |
| deletion in CBS6039              | 10                      | 10                      | 3                          | 118                        | 400584                         | 409219                         |
| insertion/duplication in CBS6039 | 5                       | 5                       | 3                          | -49                        | 1548781                        | 1533366                        |
| insertion/duplication in CBS6039 | 13                      | 13                      | 4                          | -275                       | 35056                          | 36806                          |
| deletion in CBS6039              | 13                      | 13                      | 4                          | 151                        | 51583                          | 53262                          |
| insertion/duplication in CBS6039 | 4                       | 4                       | 4                          | -32                        | 80529                          | 81475                          |
| deletion in CBS6039              | 6                       | 6                       | 4                          | 165                        | 116702                         | 1412148                        |
| deletion in CBS6039              | 4                       | 4                       | 4                          | 250                        | 1370447                        | 1361082                        |
| insertion/duplication in CBS6039 | 3                       | 3                       | 5                          | -218                       | 183877                         | 1523119                        |
| deletion in CBS6039              | 7                       | 7                       | 5                          | 122                        | 1372282                        | 1315371                        |
| deletion in CBS6039              | 3                       | 3                       | 6                          | 268                        | 1529070                        | 178014                         |
| insertion/duplication in CBS6039 | 8                       | 8                       | 9                          | -209                       | 787682                         | 791043                         |
| deletion in CBS6039              | 13                      | 13                      | 10                         | 1087                       | 1132                           | 2487                           |
| deletion in CBS6039              | 8                       | 8                       | 10                         | 535                        | 52294                          | 52997                          |
| deletion in CBS6039              | 9                       | 9                       | 10                         | 100                        | 1075209                        | 1078971                        |
| insertion in CBS6039             | 6                       | 6                       | 13                         | 0                          | 205096                         | 1323896                        |
| deletion in CBS6039              | 11                      | 11                      | 15                         | 150                        | 98772                          | 98266                          |
| insertion/duplication in CBS6039 | 2                       | 1                       | 15                         | -132                       | 671293                         | 657962                         |
| deletion in CBS6039              | 12                      | 12                      | 15                         | 322                        | 1039872                        | 22068                          |
| deletion in CBS6039              | 6                       | 6                       | 15                         | 107                        | 1429306                        | 112419                         |
| deletion in CBS6039              | 11                      | 11                      | 16                         | 453                        | 50402                          | 51087                          |
| insertion in CBS6039             | 3                       | 3                       | 17                         | 0                          | 1536211                        | 170741                         |
| insertion in CBS6039             | 6                       | 6                       | 18                         | 0                          | 201337                         | 1327640                        |

| Type of event                    | CBS6039<br>(chromosome) | CBS6273<br>(chromosome) | Size of event<br>(CBS6039) | Size of event<br>(CBS6273) | Midpoint of event<br>(CBS6039) | Midpoint of event<br>(CBS6273) |
|----------------------------------|-------------------------|-------------------------|----------------------------|----------------------------|--------------------------------|--------------------------------|
| insertion/duplication in CBS6039 | 10                      | 10                      | 18                         | -21                        | 1067543                        | 1080188                        |
| insertion in CBS6039             | 5                       | 5                       | 18                         | 0                          | 1114534                        | 1101327                        |
| insertion in CBS6039             | 6                       | 6                       | 20                         | 0                          | 223747                         | 1305252                        |
| deletion in CBS6039              | 6                       | 6                       | 21                         | 304                        | 1173120                        | 368498                         |
| deletion in CBS6039              | 11                      | 11                      | 27                         | 191                        | 795299                         | 813573                         |
| insertion/duplication in CBS6039 | 1                       | 2                       | 34                         | -4                         | 2073272                        | 152344                         |
| insertion/duplication in CBS6039 | 7                       | 7                       | 36                         | -54                        | 392518                         | 326755                         |
| inversion in CBS6273             | 13                      | 13                      | 37                         | 1942                       | 582                            | 2488                           |
| deletion in CBS6039              | 6                       | 6                       | 37                         | 239                        | 1354293                        | 187768                         |
| insertion in CBS6039             | 3                       | 3                       | 39                         | 0                          | 849424                         | 857844                         |
| insertion/duplication in CBS6039 | 3                       | 3                       | 40                         | -2                         | 142986                         | 1563898                        |
| insertion in CBS6039             | 3                       | 3                       | 42                         | 0                          | 1536574                        | 170409                         |
| insertion in CBS6039             | 6                       | 6                       | 43                         | 0                          | 314907                         | 1214143                        |
| insertion/duplication in CBS6039 | 12                      | 12                      | 43                         | -2                         | 391203                         | 702437                         |
| insertion in CBS6039             | 1                       | 2                       | 45                         | 0                          | 254193                         | 1971096                        |
| insertion in CBS6039             | 2                       | 1                       | 45                         | 0                          | 1585910                        | 1593773                        |
| insertion in CBS6039             | 11                      | 11                      | 48                         | 0                          | 1047845                        | 1066228                        |
| insertion in CBS6039             | 1                       | 2                       | 56                         | 2                          | 589084                         | 1635224                        |
| insertion/duplication in CBS6039 | 6                       | 6                       | 65                         | -3                         | 432988                         | 1096121                        |
| insertion/duplication in CBS6039 | 3                       | 3                       | 77                         | -172                       | 1518913                        | 188183                         |
| insertion in CBS6039             | 6                       | 6                       | 84                         | 0                          | 1238243                        | 303298                         |
| insertion/duplication in CBS6039 | 7                       | scaffold00016           | 88                         | -6                         | 46436                          | 51776                          |
| insertion in CBS6039             | 6                       | 6                       | 96                         | 0                          | 1226341                        | 315150                         |
| insertion in CBS6039             | 11                      | 11                      | 102                        | 0                          | 466447                         | 466910                         |
| insertion in CBS6039             | 3                       | 3                       | 104                        | 1                          | 725398                         | 981818                         |
| insertion in CBS6039             | 12                      | 12                      | 105                        | 1                          | 1038125                        | 23916                          |
| deletion in CBS6039              | 10                      | 10                      | 105                        | 904                        | 1048312                        | 1060603                        |
| insertion/duplication in CBS6039 | 2                       | 1                       | 107                        | -18                        | 140786                         | 126371                         |
| insertion/duplication in CBS6039 | 1                       | 2                       | 108                        | -90                        | 1660211                        | 565541                         |
| insertion in CBS6039             | 2                       | 1                       | 116                        | 1                          | 43120                          | 43087                          |
| deletion in CBS6039              | 8                       | 8                       | 117                        | 675                        | 3260                           | 3460                           |
| insertion in CBS6039             | 7                       | 7                       | 124                        | 0                          | 1096446                        | 1032073                        |
| deletion in CBS6039              | 4                       | 4                       | 124                        | 991                        | 1467642                        | 1459956                        |
| insertion in CBS6039             | 1                       | 2                       | 131                        | 2                          | 54215                          | 2170491                        |

| Type of event                    | CBS6039<br>(chromosome) | CBS6273<br>(chromosome) | Size of event<br>(CBS6039) | Size of event<br>(CBS6273) | Midpoint of event<br>(CBS6039) | Midpoint of event<br>(CBS6273) |
|----------------------------------|-------------------------|-------------------------|----------------------------|----------------------------|--------------------------------|--------------------------------|
| insertion in CBS6039             | 5                       | 5                       | 140                        | 0                          | 852178                         | 839079                         |
| inversion in CBS6273             | 14                      | 14                      | 141                        | 2                          | 829659                         | 842582                         |
| insertion in CBS6039             | 5                       | 5                       | 146                        | 1                          | 125981                         | 127515                         |
| insertion/duplication in CBS6039 | 6                       | 6                       | 146                        | -22                        | 1525550                        | 16613                          |
| insertion in CBS6039             | 7                       | 7                       | 147                        | 3                          | 128019                         | 68982                          |
| insertion/duplication in CBS6039 | 6                       | 6                       | 150                        | -23                        | 100024                         | 1428882                        |
| insertion/duplication in CBS6039 | 11                      | 11                      | 152                        | -1                         | 66832                          | 67682                          |
| insertion/duplication in CBS6039 | 6                       | 6                       | 152                        | -186                       | 1489605                        | 52330                          |
| inversion in CBS6273             | 6                       | 6                       | 154                        | 0                          | 1211762                        | 329762                         |
| deletion in CBS6039              | 11                      | 11                      | 165                        | 951                        | 28607                          | 28649                          |
| insertion in CBS6039             | 10                      | 10                      | 165                        | 0                          | 1100936                        | 1113992                        |
| insertion/duplication in CBS6039 | 8                       | 8                       | 167                        | -1                         | 1277335                        | 1280168                        |
| insertion in CBS6039             | 5                       | 5                       | 169                        | 0                          | 237830                         | 226250                         |
| insertion in CBS6039             | 9                       | 9                       | 169                        | 0                          | 740441                         | 741598                         |
| insertion in CBS6039             | 8                       | 8                       | 184                        | 0                          | 1392504                        | 1389977                        |
| insertion/duplication in CBS6039 | 2                       | 1                       | 189                        | -4                         | 686051                         | 672538                         |
| insertion in CBS6039             | 13                      | 13                      | 191                        | 1                          | 528365                         | 528611                         |
| insertion/duplication in CBS6039 | 14                      | 14                      | 195                        | -6                         | 794265                         | 807906                         |
| insertion/duplication in CBS6039 | 4                       | 4                       | 197                        | -5                         | 75941                          | 77002                          |
| insertion/duplication in CBS6039 | 13                      | 13                      | 200                        | -8                         | 99509                          | 101756                         |
| insertion in CBS6039             | 3                       | 3                       | 202                        | 28                         | 1558126                        | 148967                         |
| insertion/duplication in CBS6039 | 4                       | 4                       | 216                        | -6                         | 1366027                        | 1356020                        |
| insertion/duplication in CBS6039 | 1                       | 2                       | 216                        | -6                         | 2205236                        | 22044                          |
| inversion in CBS6273             | 1                       | 2                       | 220                        | 12                         | 2225656                        | 1843                           |
| insertion in CBS6039             | 6                       | 6                       | 221                        | 6                          | 200648                         | 1328212                        |
| inversion in CBS6273             | 11                      | 11                      | 224                        | 2                          | 1106840                        | 1125333                        |
| insertion/duplication in CBS6039 | 11                      | 11                      | 226                        | -6                         | 1084401                        | 1102647                        |
| insertion/duplication in CBS6039 | 12                      | 12                      | 247                        | -5                         | 276823                         | 816663                         |
| insertion/duplication in CBS6039 | 5                       | 5                       | 249                        | -1                         | 76538                          | 79664                          |
| insertion/duplication in CBS6039 | 13                      | 13                      | 265                        | -1                         | 967458                         | 970044                         |
| insertion/duplication in CBS6039 | 1                       | 2                       | 267                        | -5                         | 2167995                        | 57546                          |
| insertion/duplication in CBS6039 | 1                       | 2                       | 304                        | -11                        | 2180102                        | 45734                          |
| insertion/duplication in CBS6039 | 4                       | 4                       | 310                        | -5                         | 1367891                        | 1357615                        |
| insertion/duplication in CBS6039 | 12                      | 12                      | 311                        | -5                         | 18114                          | 1075569                        |

| Type of event                    | CBS6039<br>(chromosome) | CBS6273<br>(chromosome) | Size of event<br>(CBS6039) | Size of event<br>(CBS6273) | Midpoint of event<br>(CBS6039) | Midpoint of event<br>(CBS6273) |
|----------------------------------|-------------------------|-------------------------|----------------------------|----------------------------|--------------------------------|--------------------------------|
| insertion/duplication in CBS6039 | 5                       | 5                       | 315                        | -23                        | 75377                          | 78797                          |
| insertion/duplication in CBS6039 | 10                      | 10                      | 347                        | -294                       | 944534                         | 957529                         |
| insertion/duplication in CBS6039 | 12                      | 12                      | 354                        | -3                         | 186269                         | 906916                         |
| insertion in CBS6039             | 7                       | 7                       | 374                        | 2                          | 118211                         | 58887                          |
| insertion in CBS6039             | 1                       | 2                       | 384                        | 0                          | 1152712                        | 1071691                        |
| insertion in CBS6039             | 1                       | 2                       | 384                        | 76                         | 1306576                        | 918981                         |
| inversion in CBS6273             | 8                       | 8                       | 401                        | 0                          | 1427230                        | 1424392                        |
| deletion in CBS6039              | 12                      | 12                      | 428                        | 2452                       | 617923                         | 449769                         |
| insertion/duplication in CBS6039 | 11                      | 11                      | 459                        | -255                       | 793599                         | 812159                         |
| insertion/duplication in CBS6039 | 10                      | 10                      | 512                        | -4                         | 1042369                        | 1054502                        |
| insertion/duplication in CBS6039 | 6                       | 6                       | 533                        | -192                       | 1242164                        | 299630                         |
| insertion in CBS6039             | 1                       | 2                       | 593                        | 22                         | 186585                         | 2038368                        |
| insertion/duplication in CBS6039 | 8                       | 8                       | 620                        | -6                         | 1298445                        | 1300895                        |
| insertion/duplication in CBS6039 | 1                       | 2                       | 724                        | -508                       | 2184885                        | 41715                          |
| insertion/duplication in CBS6039 | 14                      | 14                      | 750                        | -1                         | 281811                         | 282055                         |
| insertion/duplication in CBS6039 | 5                       | 5                       | 775                        | -590                       | 692676                         | 680349                         |
| deletion in CBS6039              | 11                      | 11                      | 779                        | 13820                      | 560302                         | 567636                         |
| deletion in CBS6039              | 7                       | 7                       | 838                        | 4457                       | 1432721                        | 1378297                        |
| insertion in CBS6039             | 2                       | 1                       | 995                        | 107                        | 219232                         | 204493                         |
| insertion/duplication in CBS6039 | 9                       | 9                       | 1007                       | -1                         | 1131700                        | 1130522                        |
| insertion in CBS6039             | 11                      | 11                      | 1029                       | 127                        | 712924                         | 732304                         |
| insertion/duplication in CBS6039 | 2                       | 1                       | 1203                       | -54                        | 2187555                        | 2191876                        |
| insertion/duplication in CBS6039 | 11                      | 11                      | 1344                       | -2                         | 93263                          | 93363                          |
| insertion/duplication in CBS6039 | 5                       | 5                       | 1486                       | -4                         | 124972                         | 127325                         |
| insertion/duplication in CBS6039 | 1                       | 2                       | 1500                       | -86                        | 2055678                        | 170194                         |
| insertion/duplication in CBS6039 | 11                      | 11                      | 1704                       | -11                        | 973647                         | 992929                         |
| insertion/duplication in CBS6039 | 13                      | 13                      | 1983                       | -6                         | 158962                         | 160107                         |
| insertion/duplication in CBS6039 | 14                      | 14                      | 1984                       | -5                         | 797421                         | 809966                         |
| insertion/duplication in CBS6039 | 10                      | 10                      | 2248                       | -3                         | 117573                         | 125506                         |
| insertion/duplication in CBS6039 | 7                       | 7                       | 2335                       | -1                         | 145615                         | 85138                          |
| insertion in CBS6039             | 9                       | 9                       | 2403                       | 74                         | 1151893                        | 1149033                        |
| inversion in CBS6273             | 9                       | 9                       | 3126                       | -170                       | 290278                         | 292953                         |
| insertion/duplication in CBS6039 | 4                       | 4                       | 3139                       | -2                         | 1489229                        | 1482549                        |
| insertion/duplication in CBS6039 | 2                       | 1                       | 3300                       | -945                       | 2158732                        | 2165808                        |

| Type of event                    | CBS6039<br>(chromosome) | CBS6273<br>(chromosome) | Size of event<br>(CBS6039) | Size of event<br>(CBS6273) | Midpoint of event<br>(CBS6039) | Midpoint of event<br>(CBS6273) |
|----------------------------------|-------------------------|-------------------------|----------------------------|----------------------------|--------------------------------|--------------------------------|
| insertion/duplication in CBS6039 | 7                       | 7                       | 3385                       | -743                       | 188011                         | 124204                         |
| insertion/duplication in CBS6039 | 10                      | 10                      | 3387                       | -233                       | 1103229                        | 1114379                        |
| inversion in CBS6273             | 9                       | 9                       | 4275                       | 172                        | 1213248                        | 1201367                        |
| insertion/duplication in CBS6039 | 8                       | 8                       | 4664                       | -58                        | 1320415                        | 1320309                        |
| insertion in CBS6039             | 9                       | 9                       | 5428                       | 765                        | 1103900                        | 1105555                        |
| insertion in CBS6039             | 4                       | 4                       | 11819                      | 6                          | 1106865                        | 1102898                        |
| insertion/duplication in CBS6039 | 2                       | 1                       | 11919                      | -2628                      | 55384                          | 48349                          |
| insertion in CBS6039             | 5                       | 5                       | 13155                      | 14                         | 159052                         | 154234                         |
