# Supplementary material for: Fungal genome and mating system transitions facilitated by chromosomal translocations involving intercentromeric recombination
Source: PubMed Central journal article supplement (PMC5568439; doi:10.1371/journal.pbio.2002527), 2017-08-11
Supplement: pbio.2002527.s008.pdf [file pbio.2002527.s008.pdf]

Table S2. Pathways enriched in the genomes of *C. amyloletus* compared to those of pathogenic *Cryptococcus* species

| Pathway                                                             | CRAM_CBS6039 <sup>1</sup> | CRAM_CBS6273 <sup>1</sup> | Pathogenic_H99 <sup>2</sup> | Pathogenic_JEC21 <sup>2</sup> | Pathogenic_R265 <sup>2</sup> | Pathogenic_WM276 <sup>2</sup> | log2(CRAM/ Pathogenic) | rawPvalue | Qvalue   |
|---------------------------------------------------------------------|---------------------------|---------------------------|-----------------------------|-------------------------------|------------------------------|-------------------------------|------------------------|-----------|----------|
| PF13460.1 NAD_binding_10<br>[NADH(P)-binding]                       | 56                        | 54                        | 20                          | 23                            | 14                           | 16                            | 2.43                   | 3.20E-11  | 1.33E-07 |
| PF00201.13 UDPGT<br>[UDP-glucuronosyl_and_UDP-glucosyl_transferase] | 14                        | 14                        | 2                           | 2                             | 1                            | 2                             | 3.78                   | 1.12E-07  | 2.34E-04 |
| PF04616.9 Glyco_hydro_43<br>[Glycosyl_hydrolases_family_43]         | 5                         | 5                         | 0                           | 0                             | 0                            | 0                             | 6.51                   | 3.47E-05  | 3.24E-02 |
| PF05368.8 NmrA<br>[NmrA-like_family]                                | 30                        | 29                        | 12                          | 16                            | 9                            | 10                            | 2.16                   | 3.90E-05  | 3.24E-02 |

1: "CRAM" indicates *C. amyloletus*.

2: "Pathogenic" indicates species within the human pathogenic *Cryptococcus* species complex.
