# Supplementary material for: Fungal genome and mating system transitions facilitated by chromosomal translocations involving intercentromeric recombination
Source: PubMed Central journal article supplement (PMC5568439; doi:10.1371/journal.pbio.2002527), 2017-08-11
Supplement: pbio.2002527.s009.pdf [file pbio.2002527.s009.pdf]

Table S3. List of ORFs identified that are flanking or within the candidate centromeric regions in CBS6039

| Chromosome       | Region           | Coordinates (size; bp)   | ORF (size; no. of amino acids) <sup>1</sup> | Description <sup>2</sup> | Ortholog in the H99 genome <sup>3</sup> |
|------------------|------------------|--------------------------|---------------------------------------------|--------------------------|-----------------------------------------|
| 1                | Flanking (left)  | 1259704-1261928          | CRAM_01_00527                               |                          | <b>CNAG 01780</b>                       |
|                  | Intra-centromere | 1261929-1292020 (30,091) | CRAM_01_00528 (125)                         | Transposon               |                                         |
|                  |                  |                          | CRAM_01_00530 (108)                         | Transposon               |                                         |
|                  | Flanking (right) | 1292021-1293761          | CRAM_01_00532                               |                          | <b>CNAG 03796</b>                       |
| 2                | Flanking (left)  | 979876-981299            | CRAM_02_01330                               |                          | <b>CNAG 01788</b>                       |
|                  | Intra-centromere | 981300-1003798 (22,498)  | CRAM_02_01331 (266)                         | Transposon               |                                         |
|                  | Flanking (right) | 1003799-1005713          | CRAM_02_01332                               |                          |                                         |
| 3                | Flanking (left)  | 1036140-1037292          | CRAM_03_02287                               |                          | <b>CNAG 06453</b>                       |
|                  | Intra-centromere | 1037293-1069522 (32,229) | CRAM_03_02289 (255)                         | Transposon               |                                         |
|                  |                  |                          | CRAM_03_02290 (152)                         | Transposon               |                                         |
|                  |                  |                          | CRAM_03_02291 (244)                         | n.a.                     |                                         |
|                  |                  |                          | CRAM_03_02292 (230)                         | Transposon               |                                         |
|                  |                  |                          | CRAM_03_02293 (115)                         | n.a.                     |                                         |
|                  |                  |                          | CRAM_03_02294 (175)                         | Transposon               |                                         |
|                  | Flanking (right) | 1069523-1072581          | CRAM_03_02295                               |                          |                                         |
| 4                | Flanking (left)  | 227481-229236            | CRAM_04_02687                               |                          | <b>CNAG 00926</b>                       |
|                  | Intra-centromere | 229237-277616 (48,379)   | CRAM_04_02688 (67)                          | n.a.                     |                                         |
|                  |                  |                          | CRAM_04_02689 (207)                         | Transposon               |                                         |
|                  |                  |                          | CRAM_04_02690 (85)                          | n.a.                     |                                         |
|                  |                  |                          | CRAM_04_02691 (286)                         | Similar to transposase   |                                         |
|                  |                  |                          | CRAM_04_02692 (163)                         | n.a.                     |                                         |
|                  |                  |                          | CRAM_04_02693 (116)                         | n.a.                     |                                         |
|                  |                  |                          | CRAM_04_02694 (736)                         | Hypothetical protein     |                                         |
|                  |                  |                          | CRAM_04_02695 (125)                         | n.a.                     |                                         |
|                  |                  |                          | CRAM_04_02696 (495)                         | Transposon               |                                         |
|                  |                  | CRAM_04_02697 (747)      | Transposon                                  |                          |                                         |
| Flanking (right) | 277617-281635    | CRAM_04_02698            |                                             | <b>CNAG 05242</b>        |                                         |
| 5                | Flanking (left)  | 330603-332956            | CRAM_05_03401                               |                          | <b>CNAG 04824</b>                       |
|                  | Intra-centromere | 332957-371191 (38,234)   | CRAM_05_03402 (122)                         | n.a.                     |                                         |
|                  |                  |                          | CRAM_05_03403 (418)                         | Transposon               |                                         |
|                  |                  |                          | CRAM_05_03404 (351)                         | Transposon               |                                         |
|                  |                  |                          | CRAM_05_03405 (498)                         | Transposon               |                                         |
|                  |                  | CRAM_05_03406 (135)      | n.a.                                        |                          |                                         |
| Flanking (right) | 371192-372988    | CRAM_05_03407            |                                             | <b>CNAG 04853</b>        |                                         |
| 6                | Flanking (left)  | 787089-788876            | CRAM_06_04254                               |                          | <b>CNAG 07163</b>                       |

| Chromosome          | Region           | Coordinates (size; bp)   | ORF (size; no. of amino acids) <sup>1</sup> | Description <sup>2</sup> | Ortholog in the H99 genome <sup>3</sup> |  |                   |
|---------------------|------------------|--------------------------|---------------------------------------------|--------------------------|-----------------------------------------|--|-------------------|
| 6                   | Intra-centromere | 788876-828761 (39,884)   | CRAM_06_04255 (183)                         | Hypothetical protein     |                                         |  |                   |
|                     |                  |                          | CRAM_06_04256 (139)                         | Hypothetical protein     |                                         |  |                   |
|                     |                  |                          | CRAM_06_04257 (328)                         | Transposon               |                                         |  |                   |
|                     |                  |                          | CRAM_06_04258 (151)                         | Transposon               |                                         |  |                   |
|                     |                  |                          | CRAM_06_04259 (76)                          | n.a.                     |                                         |  |                   |
|                     |                  |                          | CRAM_06_04260 (201)                         | Transposon               |                                         |  |                   |
|                     |                  |                          | CRAM_06_04262 (68)                          | n.a.                     |                                         |  |                   |
| 7                   | Flanking (right) | 828760-831955            | CRAM_06_04263                               |                          | <b>CNAG_02240</b>                       |  |                   |
|                     | Flanking (left)  | 1122672-1123409          | CRAM_07_05012                               |                          | CNAG_06141                              |  |                   |
|                     | Intra-centromere | 1123410-1157926 (34,516) | CRAM_07_05013 (75)                          | Bacterial sequence [     |                                         |  |                   |
| 8                   | Flanking (right) | 1157927-1159434          | CRAM_07_05014                               |                          | <b>CNAG_06048</b>                       |  |                   |
|                     | Flanking (left)  | 894669-897481            | CRAM_08_05536                               |                          | CNAG_05517                              |  |                   |
|                     | Intra-centromere | 897482-919853 (22,371)   | CRAM_08_05537 (183)                         | n.a.                     |                                         |  |                   |
| 9                   | Intra-centromere | 822473-859020 (36,547)   | CRAM_08_05538 (110)                         | n.a.                     |                                         |  |                   |
|                     |                  |                          | CRAM_08_05539 (356)                         | Transposon               |                                         |  |                   |
|                     |                  |                          | CRAM_08_05540 (331)                         | Transposon               |                                         |  |                   |
|                     |                  |                          | CRAM_08_05541 (93)                          | n.a.                     |                                         |  |                   |
|                     |                  |                          | CRAM_08_05542 (243)                         | Transposable element     |                                         |  |                   |
|                     |                  |                          | CRAM_08_05543 (141)                         | n.a.                     |                                         |  |                   |
|                     |                  |                          | Flanking (right)                            | 919854-923991            | CRAM_08_05544                           |  | <b>CNAG_05486</b> |
|                     |                  |                          | Flanking (left)                             | 821096-822472            | CRAM_09_06076                           |  | CNAG_02609        |
|                     |                  |                          | CRAM_09_06078 (128)                         | Mouse DNA                |                                         |  |                   |
|                     |                  |                          | CRAM_09_06079 (205)                         | n.a.                     |                                         |  |                   |
| CRAM_09_06080 (145) | n.a.             |                          |                                             |                          |                                         |  |                   |
| CRAM_09_06081 (152) | n.a.             |                          |                                             |                          |                                         |  |                   |
| CRAM_09_06082 (202) | Transposon       |                          |                                             |                          |                                         |  |                   |
| 10                  | Flanking (right) | 859021-860507            | CRAM_09_06084                               |                          | CNAG_07577                              |  |                   |
|                     | Flanking (left)  | 864022-866478            | CRAM_10_06607                               |                          | CNAG_00971                              |  |                   |
|                     | Intra-centromere | 866479-897364 (30,885)   | CRAM_10_06608 (610)                         | Transposon               |                                         |  |                   |
|                     |                  |                          | CRAM_10_06609 (418)                         | Transposon               |                                         |  |                   |
|                     |                  |                          | CRAM_10_06610 (357)                         | Transposon               |                                         |  |                   |
|                     |                  |                          | CRAM_10_06611 (433)                         | Similarity with fish DNA |                                         |  |                   |
|                     |                  |                          | CRAM_10_06612 (546)                         | Transposase              |                                         |  |                   |
| CRAM_10_06613 (192) | Transposon       |                          |                                             |                          |                                         |  |                   |
| Flanking (right)    | 897365-902058    | CRAM_10_06614            |                                             | <b>CNAG_00960</b>        |                                         |  |                   |
| 11                  | Flanking (left)  | 610980-612932            | CRAM_11_06993                               |                          | <b>CNAG_05671</b>                       |  |                   |
|                     | Intra-centromere | 612543-649121 (36,578)   | CRAM_11_06994 (79)                          | n.a.                     |                                         |  |                   |

| Chromosome | Region           | Coordinates (size; bp) | ORF (size; no. of amino acids) <sup>1</sup> | Description <sup>2</sup>       | Ortholog in the H99 genome <sup>3</sup> |
|------------|------------------|------------------------|---------------------------------------------|--------------------------------|-----------------------------------------|
|            |                  |                        | CRAM_11_06995 (297)                         | Transposon                     |                                         |
|            |                  |                        | CRAM_11_06996 (343)                         | Transposon                     |                                         |
|            |                  |                        | CRAM_11_06997 (108)                         | Transposon                     |                                         |
|            |                  |                        | CRAM_11_06998 (615)                         | Transposon                     |                                         |
|            |                  |                        | CRAM_11_06999 (97)                          | n.a.                           |                                         |
|            |                  |                        | CRAM_11_07000 (505)                         | Transposon                     |                                         |
|            |                  |                        | CRAM_11_07001 (297)                         | Transposon                     |                                         |
|            |                  |                        | CRAM_11_07002 (226)                         | Transposon                     |                                         |
|            |                  |                        | CRAM_11_07003 (188)                         | n.a.                           |                                         |
|            |                  |                        | CRAM_11_07004 (202)                         | n.a.                           |                                         |
|            |                  |                        | CRAM_11_07005 (115)                         | n.a.                           |                                         |
|            | Flanking (right) | 649122-650987          | <b>CRAM_11_07006</b>                        |                                | <b>CNAG_06699</b>                       |
| 12         | Flanking (left)  | 467138-468905          | CRAM_12_07424                               |                                | CNAG_00392                              |
|            | Intra-centromere | 468906-513539 (44,634) | CRAM_12_07425 (136)                         | n.a.                           |                                         |
|            |                  |                        | CRAM_12_07426 (373)                         | Transposon                     |                                         |
|            |                  |                        | CRAM_12_07427 (526)                         | Transposon                     |                                         |
|            |                  |                        | CRAM_12_07428 (150)                         | Homology to bacterial sequence |                                         |
|            |                  |                        | CRAM_12_07429 (650)                         | Hypothetical protein           |                                         |
|            |                  |                        | CRAM_12_07430 (357)                         | Hypothetical protein           |                                         |
|            | Flanking (right) | 513540-516248          | CRAM_12_07432                               |                                | CNAG_04869                              |
| 13         | Flanking (left)  | 601369-603529          | CRAM_13_07946                               |                                | CNAG_04408                              |
|            | Intra-centromere | 603530-642666 (39,136) | CRAM_13_07947 (153)                         | n.a.                           |                                         |
|            |                  |                        | CRAM_13_07948 (80)                          | Transposon                     |                                         |
|            |                  |                        | CRAM_13_07949 (476)                         | Transposon                     |                                         |
|            |                  |                        | CRAM_13_07950 (80)                          | n.a.                           |                                         |
|            | Flanking (right) | 642667-654553          | CRAM_13_07951                               |                                | <b>CNAG_07769</b>                       |
| 14         | Flanking (left)  | 567428-570174          | CRAM_14_08367                               |                                | <b>CNAG_03258</b>                       |
|            | Intra-centromere | 570175-602631 (32,456) | CRAM_14_08369 (277)                         | Transposon                     |                                         |
|            |                  |                        | CRAM_14_08370 (624)                         | Transposon                     |                                         |
|            | Flanking (right) | 602632-603681          | CRAM_14_08371                               |                                | <b>CNAG_03251</b>                       |

<sup>1</sup>. Size estimation included only for those predicted ORFs that are located within the candidate centromeric regions.

<sup>2</sup>. n.a. indicates ORF did not return any significant hits based on BLAST of the GenBank database.

<sup>3</sup>. The ORFs that are in bold font are centromere-flanking in the H99 genome.
