# Supplementary material for: Fungal genome and mating system transitions facilitated by chromosomal translocations involving intercentromeric recombination
Source: PubMed Central journal article supplement (PMC5568439; doi:10.1371/journal.pbio.2002527), 2017-08-11
Supplement: pbio.2002527.s010.pdf [file pbio.2002527.s010.pdf]

Table S4. Summary of meiotic progeny analyzed

| Basidium | Cross                           | Germination Rate (%) | Number of progeny analyzed | Mating Type |      |      |      | Tetrad type (HD-PR) <sup>1</sup> |
|----------|---------------------------------|----------------------|----------------------------|-------------|------|------|------|----------------------------------|
|          |                                 |                      |                            | A1B1        | A1B2 | A2B1 | A2B2 |                                  |
| 1        | CBS6039 (A1B1) X CBS6273 (A2B2) | 67                   | 5                          | 5           | 0    | 0    | 0    | PD                               |
| 2        | CBS6039 (A1B1) X CBS6273 (A2B2) | 57                   | 6                          | 0           | 3    | 3    | 0    | NPD *                            |
| 3        | CBS6039 (A1B1) X CBS6273 (A2B2) | n.a.                 | 6                          | 4           | 0    | 0    | 2    | PD *                             |
| 4        | CBS6039 (A1B1) X CBS6273 (A2B2) | 81                   | 13                         | 0           | 9    | 4    | 0    | NPD *                            |
| 5        | CBS6039 (A1B1) X CBS6273 (A2B2) | 67                   | 8                          | 0           | 3    | 5    | 0    | NPD                              |
| 6        | CBS6039 (A1B1) X CBS6273 (A2B2) | 38                   | 4                          | 0           | 2    | 2    | 0    | NPD or TT                        |
| 7        | CBS6039 (A1B1) X CBS6273 (A2B2) | 89                   | 15                         | 6           | 4    | 3    | 2    | TT                               |
| 8        | CBS6039 (A1B1) X CBS6273 (A2B2) | 91                   | 20                         | 11          | 0    | 0    | 9    | PD                               |
| 9        | CBS6039 (A1B1) X CBS6273 (A2B2) | 82                   | 16                         | 9           | 0    | 0    | 7    | PD                               |
| 10       | CBS6039 (A1B1) X CBS6273 (A2B2) | n.a.                 | 7                          | 0           | 2    | 0    | 5    | TT                               |
| 11       | CBS6039 (A1B1) X CBS6273 (A2B2) | n.a.                 | 9                          | 4           | 1    | 2    | 2    | TT                               |
| 12       | CBS6039 (A1B1) X CBS6273 (A2B2) | n.a.                 | 8                          | 5           | 0    | 2    | 1    | TT                               |
| 13       | CBS6039 (A1B1) X CBS6273 (A2B2) | n.a.                 | 8                          | 4           | 0    | 4    | 0    | TT                               |
| 14       | CBS6039 (A1B1) X CBS6273 (A2B2) | n.a.                 | 7                          | 2           | 1    | 2    | 2    | TT                               |
| 15       | CBS6039 (A1B1) X CBS6273 (A2B2) | n.a.                 | 7                          | 0           | 0    | 0    | 7    | PD or TT                         |
| 16       | CBS6039 (A1B1) X CBS6273 (A2B2) | n.a.                 | 9                          | 0           | 8    | 1    | 0    | NPD *                            |
| 17       | CBS6039 (A1B1) X CBS6273 (A2B2) | n.a.                 | 3                          | 0           | 3    | 0    | 0    | NPD or TT                        |
| 18       | CBS6039 (A1B1) X CBS6273 (A2B2) | 21                   | 3                          | 3           | 0    | 0    | 0    | PD or TT                         |
| 19       | CBS6039 (A1B1) X CBS6273 (A2B2) | 38                   | 5                          | 0           | 1    | 4    | 0    | NPD or TT                        |
| 20       | CBS6039 (A1B1) X CBS6273 (A2B2) | 43                   | 9                          | 3           | 0    | 0    | 6    | PD or TT                         |
| 21       | CBS6039 (A1B1) X CBS6273 (A2B2) | 39                   | 9                          | 4           | 0    | 0    | 5    | PD or TT                         |
| 22       | CBS6039 (A1B1) X CBS6273 (A2B2) | 45                   | 11                         | 3           | 0    | 3    | 5    | TT                               |
| 23       | CBS6039 (A1B1) X CBS6273 (A2B2) | 18                   | 4                          | 0           | 0    | 4    | 0    | NPD or TT                        |
| 24       | CBS6039 (A1B1) X CBS6273 (A2B2) | 41                   | 7                          | 5           | 1    | 1    | 0    | TT                               |
| 25       | CBS6039 (A1B1) X CBS6273 (A2B2) | n.a.                 | 2                          | 0           | 1    | 1    | 0    | NPD or TT                        |
| 26       | CBS6039 (A1B1) X CBS6273 (A2B2) | n.a.                 | 4                          | 0           | 0    | 2    | 2    | TT                               |

| Basidium | Cross                           | Germination Rate (%) | Number of progeny analyzed | Mating Type |      |      |      | Tetrad type (HD-PR) <sup>1</sup> |
|----------|---------------------------------|----------------------|----------------------------|-------------|------|------|------|----------------------------------|
|          |                                 |                      |                            | A1B1        | A1B2 | A2B1 | A2B2 |                                  |
| 27       | CBS6039 (A1B1) X CBS6273 (A2B2) | n.a.                 | 3                          | 0           | 0    | 3    | 0    | NPD or TT                        |
| 28       | CBS6039 (A1B1) X CBS6273 (A2B2) | 67                   | 16                         | 5           | 10   | 0    | 1    | TT                               |
| 29       | CBS6039 (A1B1) X CBS6273 (A2B2) | 89                   | 15                         | 4           | 0    | 0    | 11   | PD *                             |
| 30       | CBS6039 (A1B1) X CBS6273 (A2B2) | 78                   | 17                         | 4           | 5    | 4    | 4    | TT                               |
| 31       | CBS6039 (A1B1) X CBS6273 (A2B2) | 53                   | 10                         | 0           | 10   | 0    | 0    | NPD *                            |
| 32       | CBS6039 (A1B1) X CBS6273 (A2B2) | 53                   | 8                          | 4           | 0    | 0    | 4    | PD or TT                         |
| 33       | CBS6039 (A1B1) X CBS6273 (A2B2) | 25                   | 3                          | 1           | 0    | 0    | 2    | PD or TT                         |
| 34       | CBS6039 (A1B1) X CBS6273 (A2B2) | 21                   | 3                          | 3           | 0    | 0    | 0    | PD or TT                         |
| 35       | CBS6039 (A1B1) X CBS6273 (A2B2) | 55                   | 12                         | 8           | 3    | 1    | 0    | TT                               |
| 36       | CBS6039 (A1B1) X CBS6273 (A2B2) | 38                   | 8                          | 0           | 0    | 0    | 8    | PD *                             |
| 37       | CBS6039 (A1B1) X CBS6273 (A2B2) | 22                   | 3                          | 3           | 0    | 0    | 0    | PD or TT                         |
| 38       | CBS6039 (A1B1) X CBS6273 (A2B2) | 50                   | 11                         | 1           | 4    | 6    | 0    | TT                               |
| 39       | CBS6039 (A1B1) X CBS6273 (A2B2) | 58                   | 15                         | 0           | 1    | 10   | 4    | TT                               |
| 40       | CBS6039 (A1B1) X CBS6273 (A2B2) | 50                   | 11                         | 0           | 6    | 5    | 0    | NPD *                            |
| 41       | CBS6039 (A1B1) X CBS6273 (A2B2) | 25                   | 6                          | 0           | 5    | 1    | 0    | NPD or TT                        |
| 42       | CBS6039 (A1B1) X CBS6273 (A2B2) | 48                   | 10                         | 5           | 4    | 0    | 1    | TT                               |
| 43       | CBS6039 (A1B1) X CBS6273 (A2B2) | 42                   | 9                          | 3           | 0    | 0    | 6    | PD or TT                         |
| 44       | CBS6039 (A1B1) X CBS6273 (A2B2) | 56                   | 12                         | 0           | 0    | 0    | 12   | PD *                             |
| 45       | CBS6039 (A1B1) X CBS6273 (A2B2) | 46                   | 12                         | 0           | 3    | 9    | 0    | NPD or TT                        |
| 46       | CBS6039 (A1B1) X CBS6273 (A2B2) | 53                   | 9                          | 0           | 5    | 4    | 0    | NPD or TT                        |
| 47       | CBS6039 (A1B1) X CBS6273 (A2B2) | 52                   | 12                         | 0           | 6    | 6    | 0    | NPD or TT                        |
| 48       | CBS6039 (A1B1) X CBS6273 (A2B2) | 25                   | 6                          | 2           | 4    | 0    | 0    | TT                               |
| 49       | CBS6039 (A1B1) X CBS6273 (A2B2) | 18                   | 3                          | 1           | 0    | 0    | 2    | PD or TT                         |
| 50       | CBS6039 (A1B1) X CBS6273 (A2B2) | 53                   | 8                          | 0           | 6    | 2    | 0    | NPD or TT                        |
| 51       | A032 (A2B2) X A067 (A1B1)       | 43                   | 3                          | 0           | 3    | 0    | 0    | NPD *                            |
| 52       | A026 (A1B2) X A052 (A2B1)       | 21                   | 4                          | 2           | 0    | 2    | 0    | TT                               |
| 53       | A026 (A1B2) X A058 (A2B1)       | 75                   | 9                          | 5           | 3    | 0    | 1    | TT                               |

| Basidium | Cross                     | Germination Rate (%) | Number of progeny analyzed | Mating Type |      |      |      | Tetrad type (HD-PR) <sup>1</sup> |
|----------|---------------------------|----------------------|----------------------------|-------------|------|------|------|----------------------------------|
|          |                           |                      |                            | A1B1        | A1B2 | A2B1 | A2B2 |                                  |
| 54       | A026 (A1B2) X A058 (A2B1) | 56                   | 13                         | 0           | 12   | 0    | 0    | PD *                             |
| 55       | A026 (A1B2) X A058 (A2B1) | 72                   | 20                         | 11          | 0    | 0    | 9    | NPD *                            |
| 56       | A028 (A1B2) X A052 (A2B1) | 58                   | 7                          | 0           | 7    | 0    | 0    | PD *                             |
| 57       | A028 (A1B2) X A058 (A2B1) | 76                   | 13                         | 3           | 7    | 2    | 1    | TT                               |
| 58       | A028 (A1B2) X A058 (A2B1) | 87                   | 12                         | 3           | 3    | 2    | 4    | TT                               |
| 59       | A028 (A1B2) X A058 (A2B1) | 85                   | 9                          | 2           | 0    | 0    | 7    | NPD                              |
| 60       | A032 (A2B2) X A108 (A1B1) | 91                   | 10                         | 8           | 0    | 2    | 0    | TT                               |
| 61       | A032 (A2B2) X A108 (A1B1) | 33                   | 3                          | 2           | 1    | 0    | 0    | TT                               |
| 62       | A032 (A2B2) X A108 (A1B1) | 33                   | 4                          | 1           | 3    | 0    | 0    | TT                               |
| 63       | A790 (A1B2) X B817 (A2B1) | 59                   | 8                          | 0           | 8    | 0    | 0    | PD *                             |
| 64       | A797 (A1B2) X B821 (A2B1) | 45                   | 5                          | 5           | 0    | 0    | 0    | NPD *                            |
| 65       | A797 (A1B2) X B821 (A2B1) | 20                   | 3                          | 0           | 1    | 2    | 0    | PD or TT                         |
| 66       | A770 (A1B2) X B817 (A2B1) | 67                   | 4                          | 0           | 0    | 4    | 0    | PD *                             |
| 67       | A770 (A1B2) X B817 (A2B1) | 25                   | 2                          | 2           | 0    | 0    | 0    | NPD or TT                        |
| 68       | A770 (A1B2) X B817 (A2B1) | 38                   | 3                          | 0           | 1    | 2    | 0    | PD or TT                         |
| 69       | A770 (A1B2) X B817 (A2B1) | 64                   | 9                          | 0           | 4    | 5    | 0    | PD or TT                         |
| 70       | A790 (A1B2) X B817 (A2B1) | 45                   | 4                          | 0           | 0    | 0    | 4    | NPD *                            |
| 71       | A790 (A1B2) X B817 (A2B1) | 100                  | 10                         | 5           | 4    | 1    | 0    | TT                               |
| 72       | A790 (A1B2) X B817 (A2B1) | 61                   | 11                         | 0           | 9    | 2    | 0    | PD or TT                         |
| 73       | A790 (A1B2) X B821 (A2B1) | 100                  | 6                          | 2           | 0    | 0    | 4    | NPD *                            |
| 74       | A790 (A1B2) X B821 (A2B1) | 100                  | 12                         | 0           | 3    | 0    | 9    | TT                               |
| 75       | A790 (A1B2) X B821 (A2B1) | 100                  | 7                          | 2           | 0    | 2    | 3    | TT                               |
| 76       | A790 (A1B2) X B821 (A2B1) | 100                  | 8                          | 3           | 3    | 2    | 0    | TT                               |

1. "\*" indicates tetrad type determination is based on both mating type loci as well as markers located in other chromosomal regions.
