# Supplementary material for: Fungal genome and mating system transitions facilitated by chromosomal translocations involving intercentromeric recombination
Source: PubMed Central journal article supplement (PMC5568439; doi:10.1371/journal.pbio.2002527), 2017-08-11
Supplement: pbio.2002527.s011.pdf [file pbio.2002527.s011.pdf]

Table S5. Markers and primers used in this study

| Markers and Probes                 | Chromosome | Location (kb) | Primer (5' - 3') |              |
|------------------------------------|------------|---------------|------------------|--------------|
|                                    |            |               | Forward          | Reverse      |
| <i>Genetic Markers<sup>1</sup></i> |            |               |                  |              |
| S2-2                               | 2          | 911           | JOHE37708/SS     | JOHE37709/SS |
| Chrom10_01                         | 10         | 67            | JOHE41915/SS     | JOHE41916/SS |
| Chrom10_02                         | 10         | 75            | JOHE41917/SS     | JOHE41918/SS |
| Chrom10_03                         | 10         | 127           | JOHE41923/SS     | JOHE41924/SS |
| Chrom10_04                         | 10         | 160           | JOHE37792/SS     | JOHE37793/SS |
| Chrom10_05                         | 10         | 226           | JOHE41927/SS     | JOHE41928/SS |
| Chrom10_06                         | 10         | 259           | JOHE37786/SS     | JOHE37787/SS |
| Chrom10_07                         | 10         | 277           | JOHE38008/SS     | JOHE38009/SS |
| Chrom10_08                         | 10         | 334           | JOHE38002/SS     | JOHE38003/SS |
| Chrom10_09                         | 10         | 421           | JOHE41931/SS     | JOHE41932/SS |
| Chrom10_10                         | 10         | 471           | JOHE37990/SS     | JOHE37991/SS |
| Chrom10_11                         | 10         | 547           | JOHE37984/SS     | JOHE37985/SS |
| Chrom10_12                         | 10         | 574           | JOHE27566/SS     | JOHE27567/SS |
| Chrom10_13                         | 10         | 665           | JOHE24627        | JOHE24630    |
| Chrom10_14                         | 10         | 678           | JOHE27538/SS     | JOHE27539/SS |
| Chrom10_15                         | 10         | 698           | JOHE38441/SS     | JOHE38442/SS |
| Chrom10_16                         | 10         | 704           | JOHE24616        | JOHE24618    |
| Chrom10_17                         | 10         | 719           | JOHE27530/SS     | JOHE27531/SS |
| Chrom10_18                         | 10         | 730           | JOHE27522/SS     | JOHE27523/SS |
| Chrom10_19                         | 10         | 785           | JOHE38383/SS     | JOHE38384/SS |
| Chrom10_20                         | 10         | 828           | JOHE41935/SS     | JOHE41936/SS |
| Chrom10_21                         | 10         | 860           | JOHE38333/SS     | JOHE38334/SS |
| Chrom10_22                         | 10         | 881           | JOHE38319/SS     | JOHE38320/SS |
| Chrom10_23                         | 10         | 962           | JOHE37600/SS     | JOHE37601/SS |
| Chrom10_24                         | 10         | 973           | JOHE37918/SS     | JOHE37919/SS |
| Chrom10_25                         | 10         | 1018          | JOHE41937/SS     | JOHE41938/SS |
| Chrom10_26                         | 10         | 1062          | JOHE37596/SS     | JOHE37597/SS |
| Chrom10_27                         | 10         | 1093          | JOHE41903/SS     | JOHE41904/SS |
| Chrom10_28                         | 10         | 1104          | JOHE41907/SS     | JOHE41908/SS |
| Chrom10_29                         | 10         | 1108          | JOHE41913/SS     | JOHE41914/SS |
| Chrom11_01                         | 11         | 30            | JOHE38050/SS     | JOHE38051/SS |
| Chrom11_02                         | 11         | 51            | JOHE38475/SS     | JOHE38476/SS |
| Chrom11_03                         | 11         | 60            | JOHE38481/SS     | JOHE38482/SS |
| Chrom11_04                         | 11         | 90            | JOHE38501/SS     | JOHE38502/SS |
| Chrom11_05                         | 11         | 105           | JOHE27570/SS     | JOHE27571/SS |
| Chrom11_06                         | 11         | 120           | JOHE27576/SS     | JOHE27577/SS |
| Chrom11_07                         | 11         | 144           | JOHE27584/SS     | JOHE27585/SS |
| Chrom11_08                         | 11         | 167           | JOHE24748        | JOHE24749    |
| Chrom11_09                         | 11         | 221           | JOHE38068/SS     | JOHE38069/SS |
| Chrom11_10                         | 11         | 267           | JOHE41939/SS     | JOHE41940/SS |
| Chrom11_11                         | 11         | 401           | JOHE38092/SS     | JOHE38093/SS |

| Markers and Probes     | Chromosome | Location (kb) | Primer (5' - 3') |              |
|------------------------|------------|---------------|------------------|--------------|
|                        |            |               | Forward          | Reverse      |
| Chrom11_12             | 11         | 408           | JOHE37822/SS     | JOHE37823/SS |
| Chrom11_13             | 11         | 450           | JOHE41945/SS     | JOHE41946/SS |
| Chrom11_14             | 11         | 469           | JOHE41953/SS     | JOHE41954/SS |
| Chrom11_15             | 11         | 510           | JOHE41957/SS     | JOHE41958/SS |
| Chrom11_16             | 11         | 607           | JOHE37834/SS     | JOHE37835/SS |
| Chrom11_17             | 11         | 656           | JOHE41981/SS     | JOHE41982/SS |
| Chrom11_18             | 11         | 713           | JOHE41985/SS     | JOHE41986/SS |
| Chrom11_19             | 11         | 742           | JOHE41987/SS     | JOHE41988/SS |
| Chrom11_20             | 11         | 787           | JOHE41989/SS     | JOHE41990/SS |
| Chrom11_21             | 11         | 826           | JOHE42001/SS     | JOHE42002/SS |
| Chrom11_22             | 11         | 847           | JOHE42013/SS     | JOHE42014/SS |
| Chrom11_23             | 11         | 902           | JOHE37672/SS     | JOHE37673/SS |
| Chrom11_24             | 11         | 1016          | JOHE42027/SS     | JOHE42028/SS |
| Chrom11_25             | 11         | 1071          | JOHE42029/SS     | JOHE42030/SS |
| <i>Southern Probes</i> |            |               |                  |              |
| Chrom01_L1             | 1          | 78            | JOHE40521/SS     | JOHE40522/SS |
| Chrom01_L2             | 1          | 1258          | JOHE40523/SS     | JOHE40524/SS |
| Chrom01_R1             | 1          | 1306          | JOHE40606/SS     | JOHE40607/SS |
| Chrom01_R2             | 1          | 2150          | JOHE40601/SS     | JOHE40602/SS |
| Chrom02_L              | 2          | 457           | JOHE40611/SS     | JOHE40612/SS |
| Chrom02_R              | 2          | 1856          | JOHE40609/SS     | JOHE40610/SS |
| Chrom03_L              | 3          | 445           | JOHE40615/SS     | JOHE40616/SS |
| Chrom03_R              | 3          | 1345          | JOHE40613/SS     | JOHE40614/SS |
| Chrom04_L              | 4          | 208           | JOHE40619/SS     | JOHE40620/SS |
| Chrom04_R              | 4          | 1248          | JOHE40617/SS     | JOHE40618/SS |
| Chrom05_L              | 5          | 216           | JOHE40623/SS     | JOHE40624/SS |
| Chrom05_R              | 5          | 1216          | JOHE40621/SS     | JOHE40622/SS |
| Chrom06_L              | 6          | 363           | JOHE40625/SS     | JOHE40626/SS |
| Chrom06_R              | 6          | 1263          | JOHE40627/SS     | JOHE40628/SS |
| Chrom07_L              | 7          | 548           | JOHE40631/SS     | JOHE40632/SS |
| Chrom07_R              | 7          | 1248          | JOHE40629/SS     | JOHE40630/SS |
| Chrom08_L              | 8          | 467           | JOHE40635/SS     | JOHE40636/SS |
| Chrom08_R              | 8          | 1167          | JOHE40633/SS     | JOHE40634/SS |
| Chrom09_L              | 9          | 562           | JOHE40637/SS     | JOHE40638/SS |
| Chrom09_R              | 9          | 962           | JOHE40639/SS     | JOHE40640/SS |
| Chrom10_L              | 10         | 262           | JOHE40643/SS     | JOHE40644/SS |
| Chrom10_R              | 10         | 962           | JOHE40641/SS     | JOHE40642/SS |
| Chrom11_L              | 11         | 345           | JOHE40647/SS     | JOHE40648/SS |
| Chrom11_R              | 11         | 716           | JOHE40645/SS     | JOHE40646/SS |
| Chrom12_L              | 12         | 40            | JOHE40531/SS     | JOHE40532/SS |
| Chrom12_R              | 12         | 984           | JOHE40529/SS     | JOHE40530/SS |
| Chrom13_L              | 13         | 240           | JOHE40651/SS     | JOHE40652/SS |

| Markers and Probes                      | Chromosome | Location (kb) | Primer (5' - 3') |              |
|-----------------------------------------|------------|---------------|------------------|--------------|
|                                         |            |               | Forward          | Reverse      |
| Chrom13_R                               | 13         | 740           | JOHE40649/SS     | JOHE40650/SS |
| Chrom14_L                               | 14         | 361           | JOHE40653/SS     | JOHE40654/SS |
| Chrom14_R                               | 14         | 690           | JOHE40655/SS     | JOHE40656/SS |
| <i>mCherry tagged Cse4 construction</i> |            |               |                  |              |
| <i>CSE4</i> promoter region             |            |               | VYP901           | VYP902       |
| mCherry sequence                        |            |               | VYP903           | VYP904       |
| <i>CSE4</i> ORF and terminator          |            |               | VYP905           | VYP906       |

<sup>1</sup>: The numbers following the underscore correspond to the marker Nos. in Figure 7.
